# Supplementary material for: Inhibition of GNNQQNY prion peptide aggregation by trehalose: a mechanistic view
Source: Royal Society of Chemistry journal article supplement (doi:10.1039/c7cp02912h), 2017-01-01
Supplement: c7cp02912h1.pdf [file c7cp02912h1.pdf]

## **Supporting Information**

# **Inhibition of GNNQQNY prion peptide aggregation by trehalose: a mechanistic view**

**Nidhi Katyal, Shashank Deep**

**Indian Institute of Technology-Delhi, India**

**Email:sdeep@chemistry.iitd.ac.in**

**S.I Table 1:** Conditions used for various MD simulations of peptide:

| <b>Temperature<br/>(K)</b> | <b>Peptide<br/>concentration<br/>(mM)</b> | <b>Number of<br/>peptide<br/>molecules</b> | <b>Number of<br/>trehalose<br/>molecules</b> | <b>Number of<br/>water<br/>molecules</b> | <b>Box<br/>length<br/>(Å)</b> | <b>Simulation<br/>length<br/>(ns)</b> |
|----------------------------|-------------------------------------------|--------------------------------------------|----------------------------------------------|------------------------------------------|-------------------------------|---------------------------------------|
| 250                        | 8                                         | 16                                         | 0                                            | 90655                                    | 139.58                        | 300                                   |
| 300                        | 4                                         | 16                                         | 0                                            | 228260                                   | 191.6                         | 300                                   |
|                            | 6                                         | 16                                         | 0                                            | 135708                                   | 161.02                        | 300                                   |
|                            | 8                                         | 16                                         | 0                                            | 69217                                    | 128.85                        | 300                                   |
|                            | 8                                         | 16                                         | 32                                           | 68172                                    | 128.37                        | 300                                   |
|                            | 8                                         | 16                                         | 96                                           | 66445                                    | 127.75                        | 300                                   |
|                            | 8                                         | 16                                         | 166                                          | 64506                                    | 127.04                        | 300                                   |
|                            | 12                                        | 16                                         | 0                                            | 72742                                    | 131.01                        | 300                                   |
|                            | 52                                        | 16                                         | 0                                            | 16460                                    | 82.23                         | 300                                   |
| 350                        | 8                                         | 16                                         | 0                                            | 90655                                    | 142.89                        | 300                                   |
| 375                        | 8                                         | 16                                         | 0                                            | 90655                                    | 144.33                        | 112                                   |

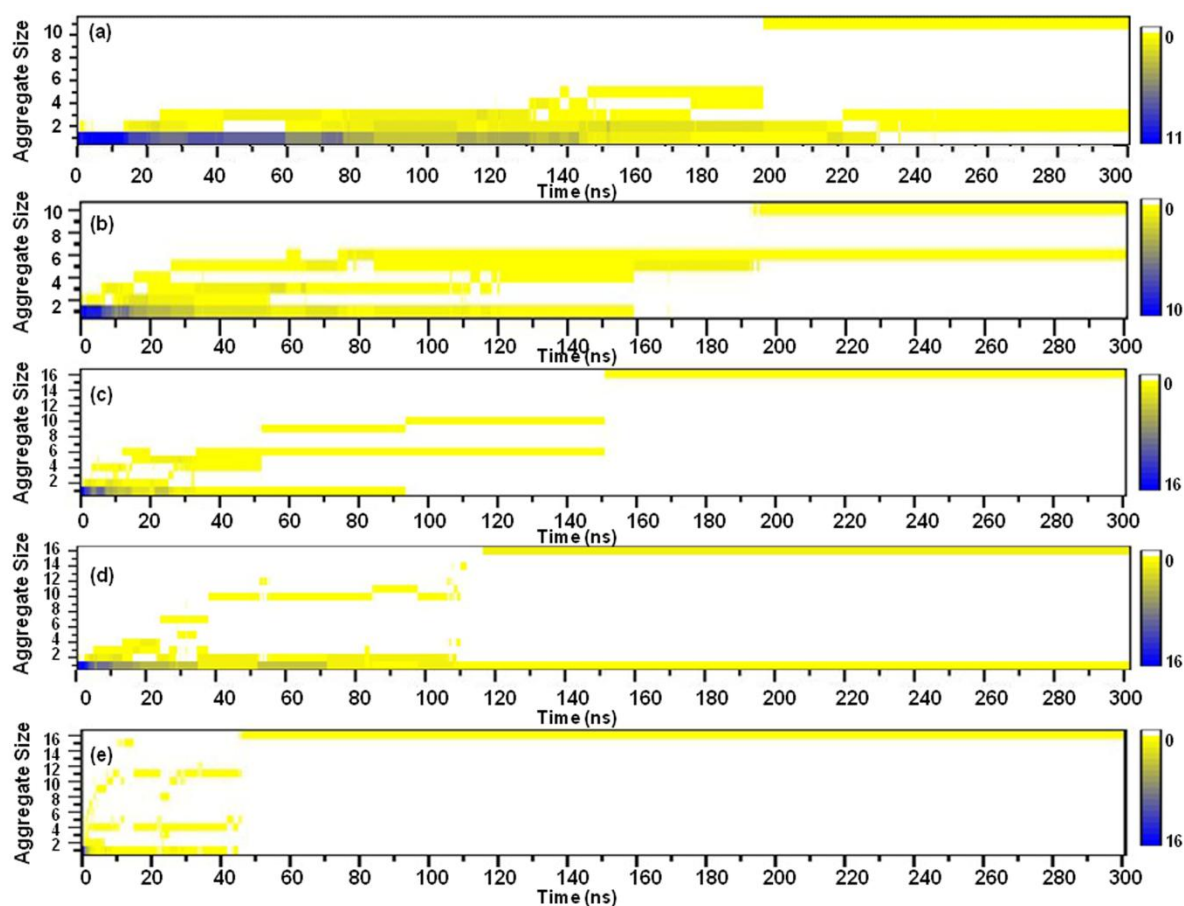

**SI Fig 1:** Time evolution of aggregate size at different peptide concentrations (a) 4 mM (b) 6 mM (c) 8 mM (d) 12 mM and (e) 52 mM. Color bar on the right represents number of peptides.

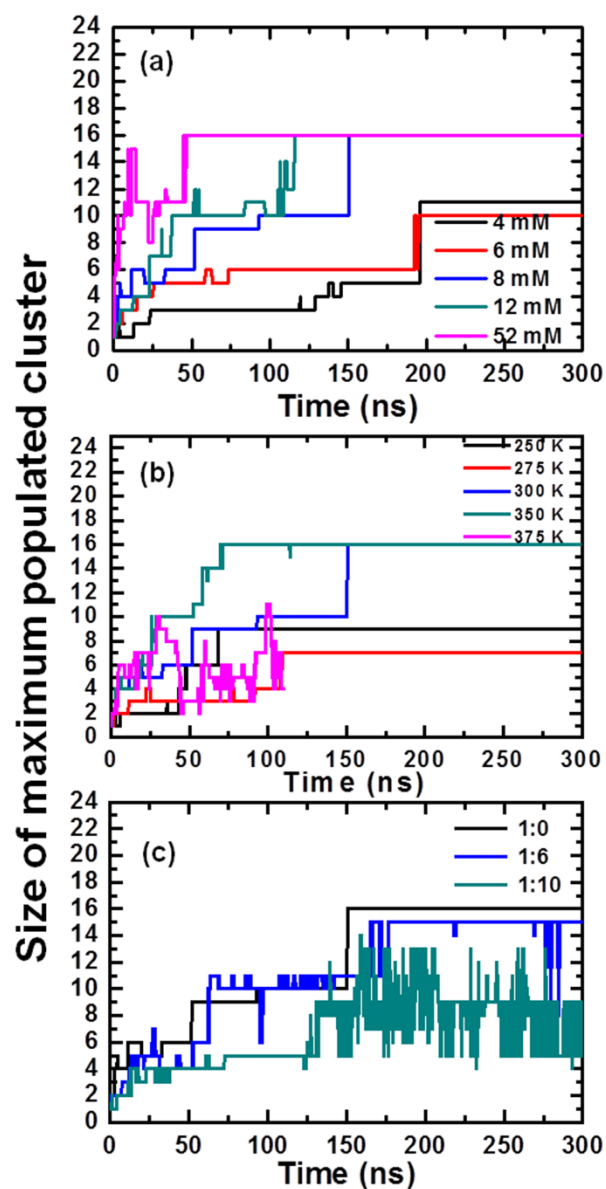

**SI Fig 2:** Time evolution of the size of the maximum populated cluster at different (a) peptide concentrations (b) temperatures and (c) peptide:trehalose molar ratio keeping peptide concentration fixed at 8 mM.

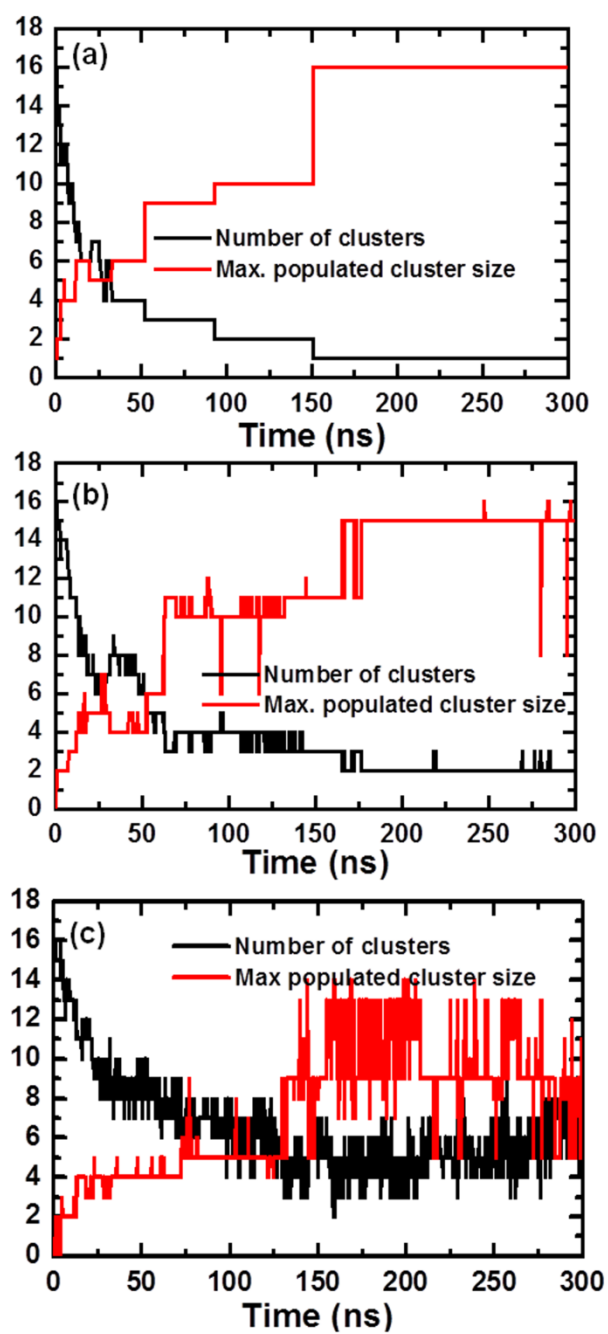

**SI Fig 3:** Simultaneous time evolution of number of clusters and maximum populated cluster size at 8 mM peptide concentration in the presence of following peptide:trehalose molar ratio: (a) 1:0 (b) 1:6 and (c) 1:10.

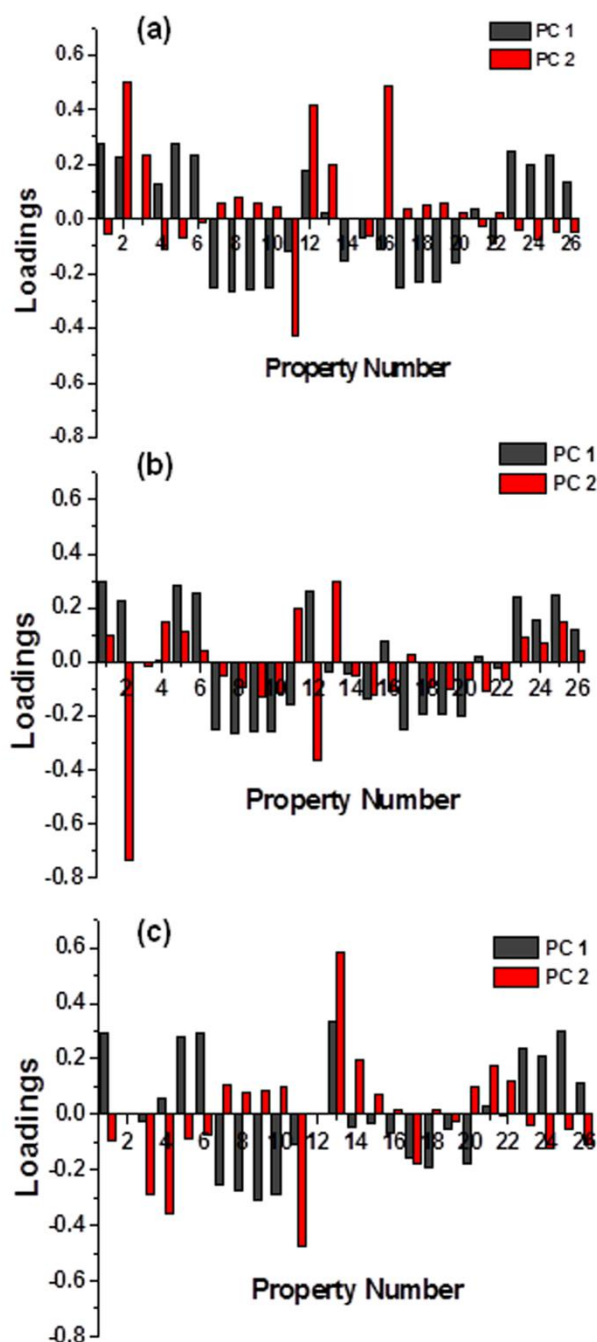

**SI Fig 4:** Bar graph representing loadings of 26 different properties for first two principal components in the presence of 8 mM peptide concentrations at different peptide:trehalose molar ratio: (a) 1:0 (b) 1:6 and (c) 1:10. Properties are: (1) Interchain contacts, (2) Beta-sheet contacts, (3) Polar order parameter P1, (4) Nematic order parameter P2, (5) Polar atom contacts, (6) Non-polar atom contacts, (7) Hydrophobic solvent accessible surface area, (8) Hydrophilic solvent accessible surface area, (9) Polar atom contacts with water, (10) Non-

polar atom contacts with water, (11) Coil content, (12) Beta-sheet content, (13) Beta-bridge content, (14) Bend content, (15) Turn content, (16) End to end distance, (17) Inter-mainchain coulombic energy, (18) Inter-mainchain Lennard Jones energy, (19) Inter-sidechain coulombic energy, (20) Inter-sidechain Lennard Jones energy, (21) Intra-mainchain coulombic energy, (22) Intra-mainchain Lennard Jones energy, (23) Mainchain-water coulombic energy, (24) Mainchain-water Lennard Jones energy, (25) Sidechain-water coulombic energy, (26) Sidechain-water Lennard Jones energy.

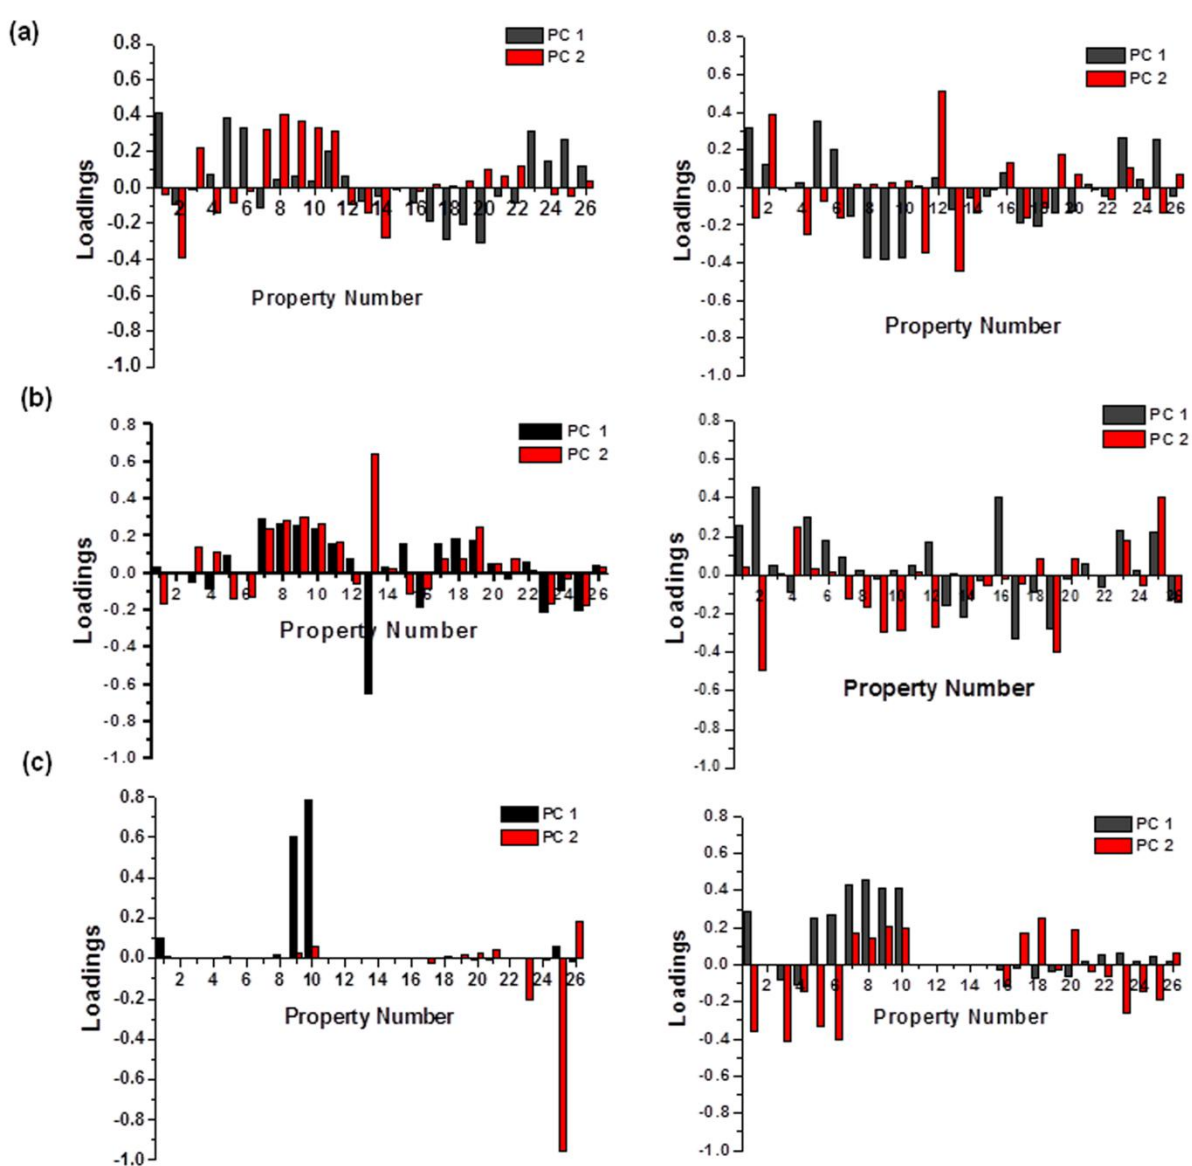

**SI Fig 5:** Bar graph representing loadings of 26 different properties for first two principal components in the presence of 8 mM peptide concentrations at different peptide:trehalose

molar ratio: (a) 1:0 (b) 1:6 and (c) 1:10. Left panel represents that during the first lag, and right panel: during the second lag. Labels and Property numbers are same as described in SI Fig 4.

**SI Table 2:** Cumulative percentage of total variance captured by first two principal components

| Protein:<br>trehalose | Lag 1 |             | Lag 2 |             | Entire duration |             |
|-----------------------|-------|-------------|-------|-------------|-----------------|-------------|
|                       | PC 1  | PC 1 + PC 2 | PC 1  | PC 1 + PC 2 | PC 1            | PC 1 + PC 2 |
| 1:0                   | 25.21 | 45.01       | 19.62 | 32.48       | 55.51           | 63.17       |
| 1:6                   | 33.41 | 48.61       | 22.52 | 34.39       | 56.30           | 64.62       |
| 1:10                  | 25.21 | 45.01       | 19.62 | 32.48       | 48.21           | 57.18       |

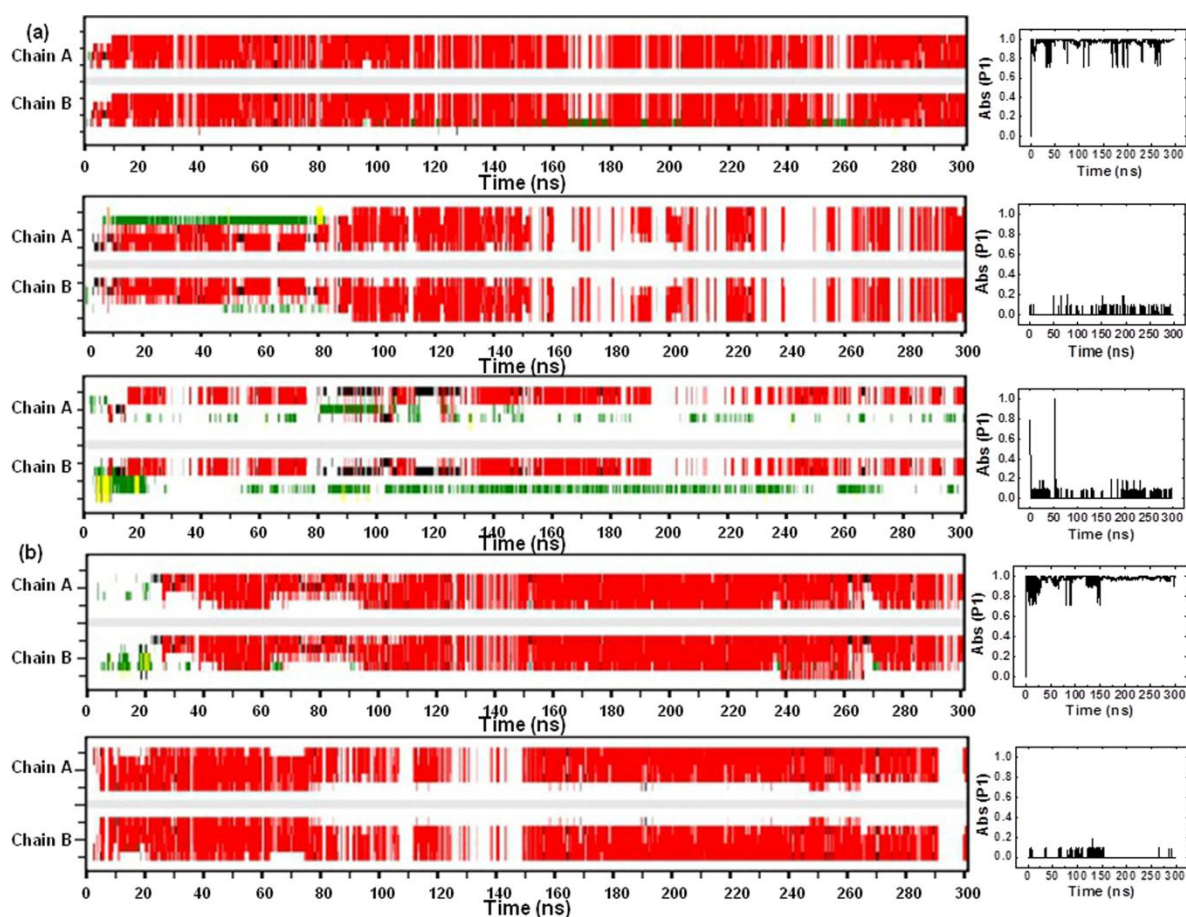

**SI Fig 6:** Secondary structure (as calculated by dssp) along with absolute value of polar order parameter for stable dimers at 8 mM peptide concentration at (a) 1:0 (b) 1:6 peptide:trehalose molar ratio.



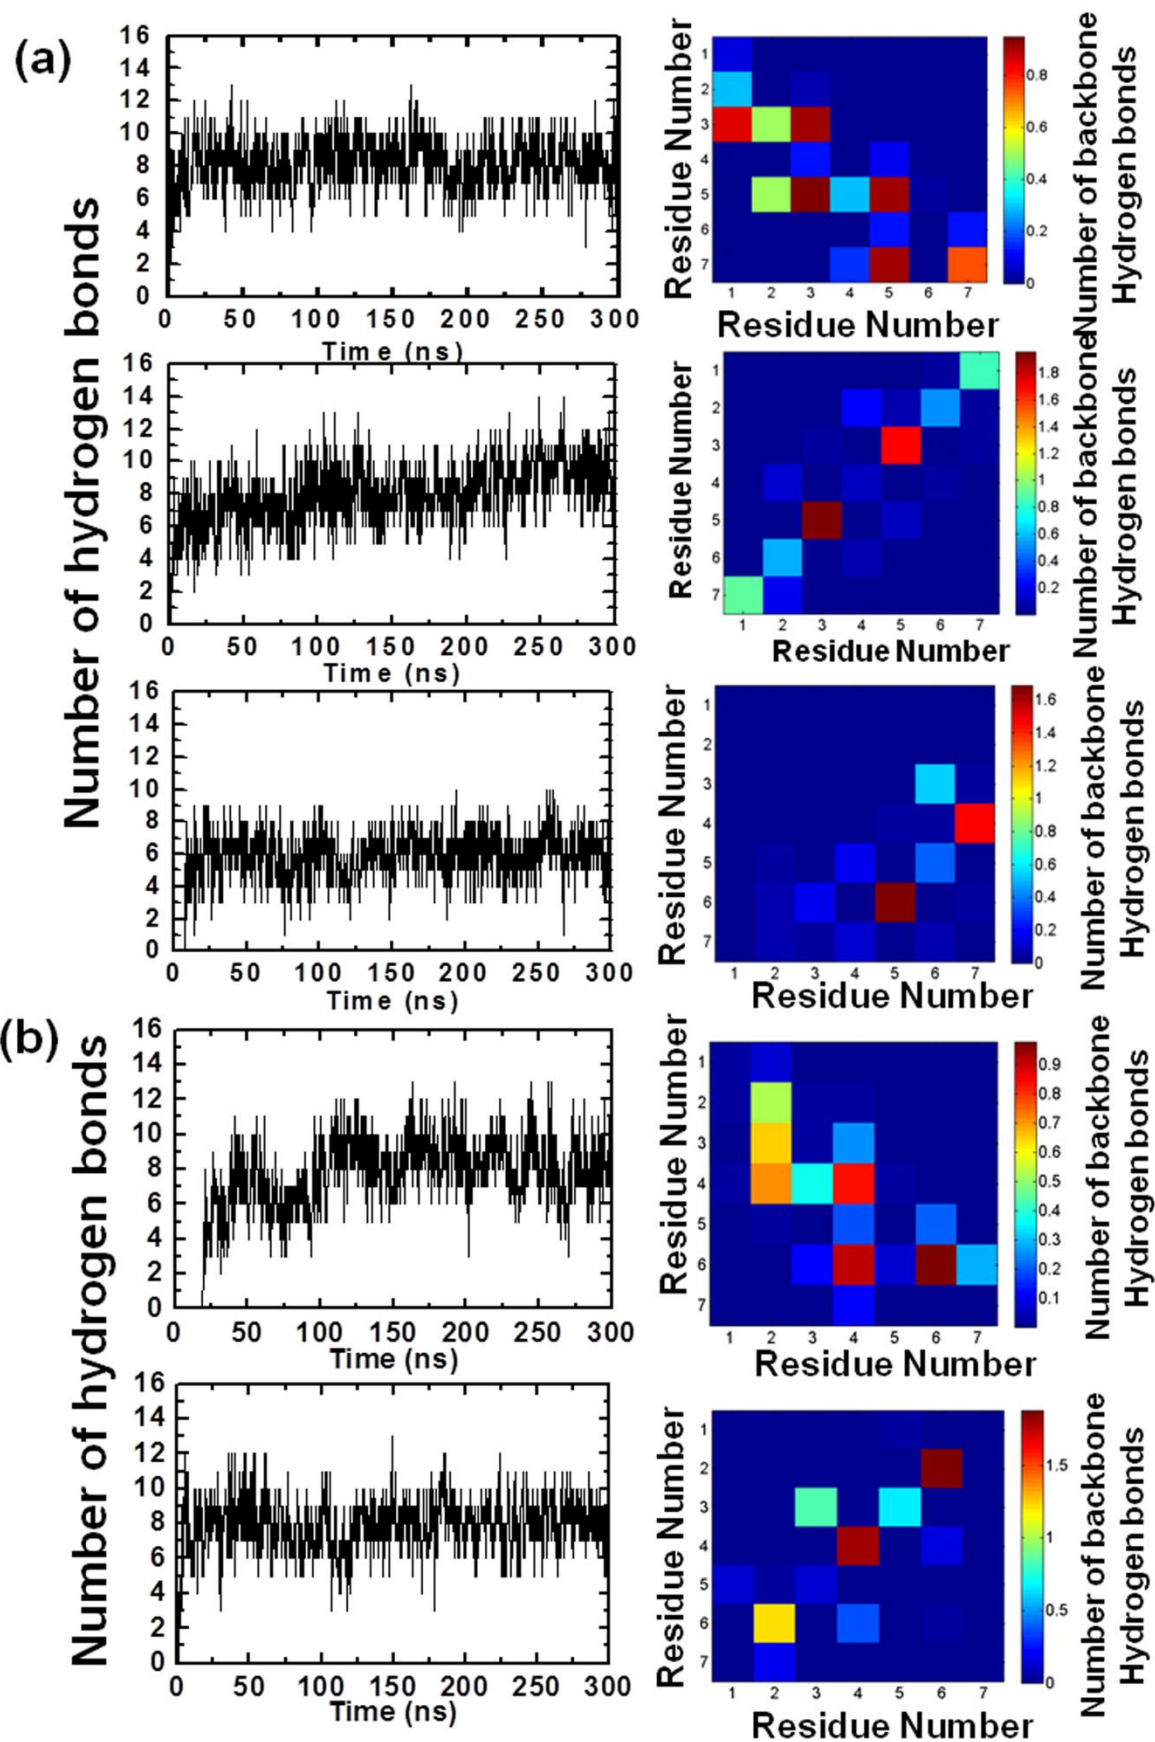



**SI Fig 7:** Left panel represents time variation of number of hydrogen bonds between stable dimers at 8 mM peptide concentration for (a) 1:0 (b) 1:6 peptide:trehalose molar ratio. Right panel denotes residue-residue hydrogen bond interactions between them averaged during the time they are in beta sheet.

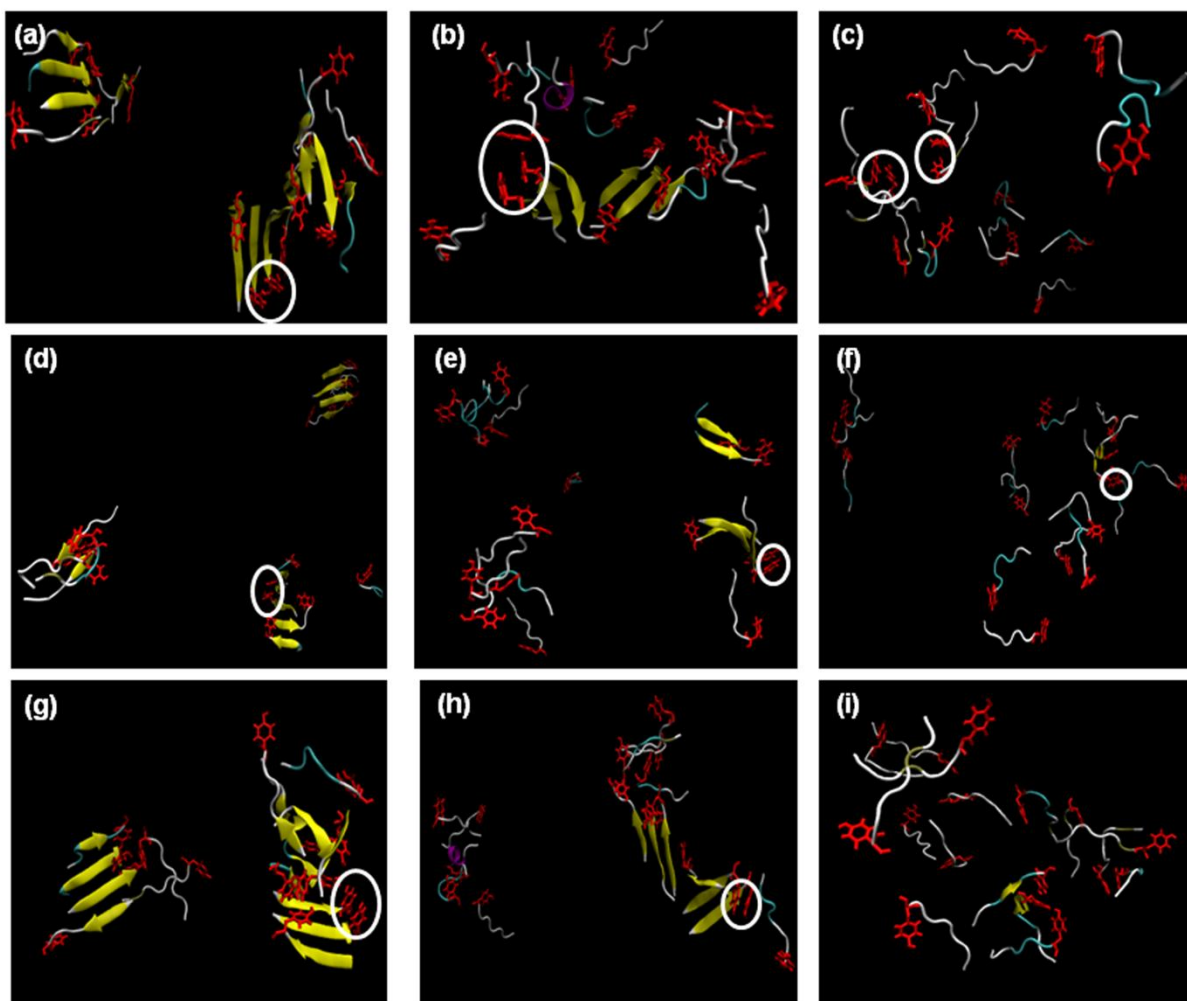

**SI Fig 8:** Most populated conformers at 8 mM peptide concentration in the presence of different peptide:trehalose molar ratio 1:0, 1:6 and 1:10 respectively during the entire course of simulation (a),(b),(c); during lag 1 (d),(e),(f); and during lag 2 (g),(h),(i). Figures are drawn in VMD<sup>[41]</sup>.

**SI Table 3:** Transition matrix representing the total number of transitions from state  $i$  (row) to state  $j$  (column) where  $i$  and  $j$  represents the maximum populated oligomeric size at

different concentrations. Transitions highlighted in italics represent condensation of oligomers; the term given in bracket below them denotes the size of the oligomers that fuse together:

(a) 1:0 peptide:trehalose molar ratio

|    | 1 | 2 | 3 | 4 | 5 | 6                 | 7 | 8 | 9                 | 10 | 11 | 12 | 13 | 14 | 15 | 16                 |
|----|---|---|---|---|---|-------------------|---|---|-------------------|----|----|----|----|----|----|--------------------|
| 1  |   | 1 |   |   |   |                   |   |   |                   |    |    |    |    |    |    |                    |
| 2  |   |   | 1 |   |   |                   |   |   |                   |    |    |    |    |    |    |                    |
| 3  |   |   |   | 1 |   |                   |   |   |                   |    |    |    |    |    |    |                    |
| 4  |   |   |   |   | 1 | <i>1</i><br>(4+2) |   |   |                   |    |    |    |    |    |    |                    |
| 5  |   |   |   | 1 |   | 1                 |   |   |                   |    |    |    |    |    |    |                    |
| 6  |   |   |   |   | 1 |                   |   |   | <i>1</i><br>(4+5) |    |    |    |    |    |    |                    |
| 7  |   |   |   |   |   |                   |   |   |                   |    |    |    |    |    |    |                    |
| 8  |   |   |   |   |   |                   |   |   |                   |    |    |    |    |    |    |                    |
| 9  |   |   |   |   |   |                   |   |   |                   | 1  |    |    |    |    |    |                    |
| 10 |   |   |   |   |   |                   |   |   |                   |    |    |    |    |    |    | <i>1</i><br>(10+6) |
| 11 |   |   |   |   |   |                   |   |   |                   |    |    |    |    |    |    |                    |
| 12 |   |   |   |   |   |                   |   |   |                   |    |    |    |    |    |    |                    |
| 13 |   |   |   |   |   |                   |   |   |                   |    |    |    |    |    |    |                    |
| 14 |   |   |   |   |   |                   |   |   |                   |    |    |    |    |    |    |                    |
| 15 |   |   |   |   |   |                   |   |   |                   |    |    |    |    |    |    |                    |
| 16 |   |   |   |   |   |                   |   |   |                   |    |    |    |    |    |    | .                  |

(b) 1:6 peptide:trehalose molar ratio

|    | 1 | 2 | 3 | 4 | 5 | 6          | 7          | 8 | 9 | 10         | 11 | 12 | 13 | 14 | 15          | 16 |
|----|---|---|---|---|---|------------|------------|---|---|------------|----|----|----|----|-------------|----|
| 1  |   | 1 |   |   |   |            |            |   |   |            |    |    |    |    |             |    |
| 2  |   |   | 1 |   |   |            |            |   |   |            |    |    |    |    |             |    |
| 3  |   |   |   | 1 |   |            |            |   |   |            |    |    |    |    |             |    |
| 4  |   |   |   |   | 8 | 2<br>(4+2) |            |   |   |            |    |    |    |    |             |    |
| 5  |   |   |   | 8 |   | 2<br>(5+2) | 1<br>(5+2) |   |   |            |    |    |    |    |             |    |
| 6  |   |   |   | 1 | 3 |            |            |   |   | 4<br>(6+4) |    |    |    |    |             |    |
| 7  |   |   |   |   |   | 1          |            |   |   |            |    |    |    |    |             |    |
| 8  |   |   |   |   |   |            |            |   |   |            |    |    |    |    | 2<br>(8+7)  |    |
| 9  |   |   |   |   |   |            |            |   |   |            |    |    |    |    |             |    |
| 10 |   |   |   |   |   | 2          |            |   |   |            | 28 |    |    |    |             |    |
| 11 |   |   |   |   |   | 1          |            |   |   | 26         |    | 3  |    |    | 4<br>(11+4) |    |
| 12 |   |   |   |   |   |            |            |   |   |            | 3  |    |    |    |             |    |
| 13 |   |   |   |   |   |            |            |   |   |            |    |    |    |    |             |    |
| 14 |   |   |   |   |   |            |            |   |   |            |    |    |    |    |             |    |
| 15 |   |   |   |   |   |            |            | 2 |   |            | 3  |    |    |    |             | 4  |
| 16 |   |   |   |   |   |            |            |   |   |            |    |    |    |    | 4           |    |

(c) 1:10 peptide:trehalose molar ratio

|    | 1 | 2 | 3 | 4          | 5          | 6 | 7          | 8          | 9           | 10 | 11           | 12           | 13                  | 14         | 15          | 16 |
|----|---|---|---|------------|------------|---|------------|------------|-------------|----|--------------|--------------|---------------------|------------|-------------|----|
| 1  |   | 3 |   |            |            |   |            |            |             |    |              |              |                     |            |             |    |
| 2  | 2 |   | 2 | 2<br>(2+2) |            |   |            |            |             |    |              |              |                     |            |             |    |
| 3  |   | 2 |   | 7          | 1<br>(3+2) |   |            |            |             |    |              |              |                     |            |             |    |
| 4  |   | 1 | 8 |            | 8          |   |            |            |             |    |              |              |                     |            |             |    |
| 5  |   |   |   | 8          |            | 6 | 3<br>(4+3) | 3<br>(5+3) | 18<br>(4+5) |    |              |              |                     |            |             |    |
| 6  |   |   |   |            | 7          |   | 1          |            |             |    |              |              |                     |            |             |    |
| 7  |   |   |   |            | 2          | 2 |            |            | 7<br>(7+2)  |    |              |              | 1<br>(7+6)          |            |             |    |
| 8  |   |   |   |            | 1          |   |            |            | 21          |    | 2<br>(8+5-2) | 2<br>(8+2+2) | 2<br>(4+8+1)        |            |             |    |
| 9  |   |   |   |            | 1<br>8     |   | 5          | 23         |             | 4  | 5<br>(9+2)   | 1<br>(9+4-1) | 36<br>(9+4),(9+2+2) | 3<br>(9+5) |             |    |
| 10 |   |   |   |            |            |   |            |            | 5           |    |              |              |                     |            | 1<br>(10+4) |    |
| 11 |   |   |   |            |            |   |            |            | 6           | 1  |              | 6            | 10                  |            |             |    |
| 12 |   |   |   |            |            |   | 1          | 1          | 1           | 1  | 2            |              | 11                  |            | 1<br>(12+2) |    |
| 13 |   |   |   |            | 1          |   | 2          | 1          | 36          |    | 13           | 6            |                     | 5          |             |    |
| 14 |   |   |   |            |            |   |            |            | 2           |    | 1            | 3            | 4                   |            |             |    |
| 15 |   |   |   |            |            |   |            |            |             |    |              |              |                     |            |             |    |
| 16 |   |   |   |            |            |   |            |            |             |    |              |              |                     |            |             |    |

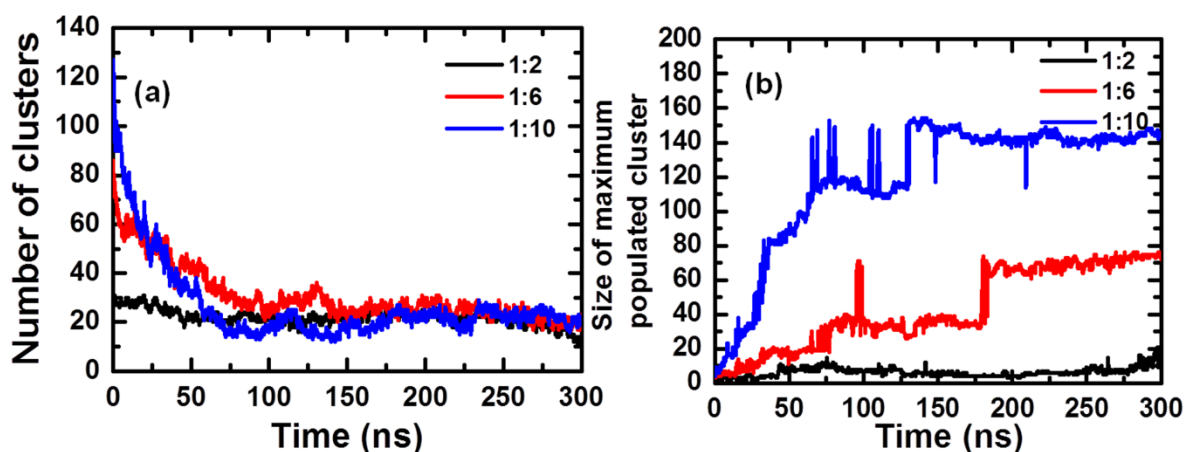

**SI Fig9:** Time variation of (a) number of clusters of trehalose (b) size of maximum populated trehalose cluster, formed at different peptide:trehalose molar ratio.

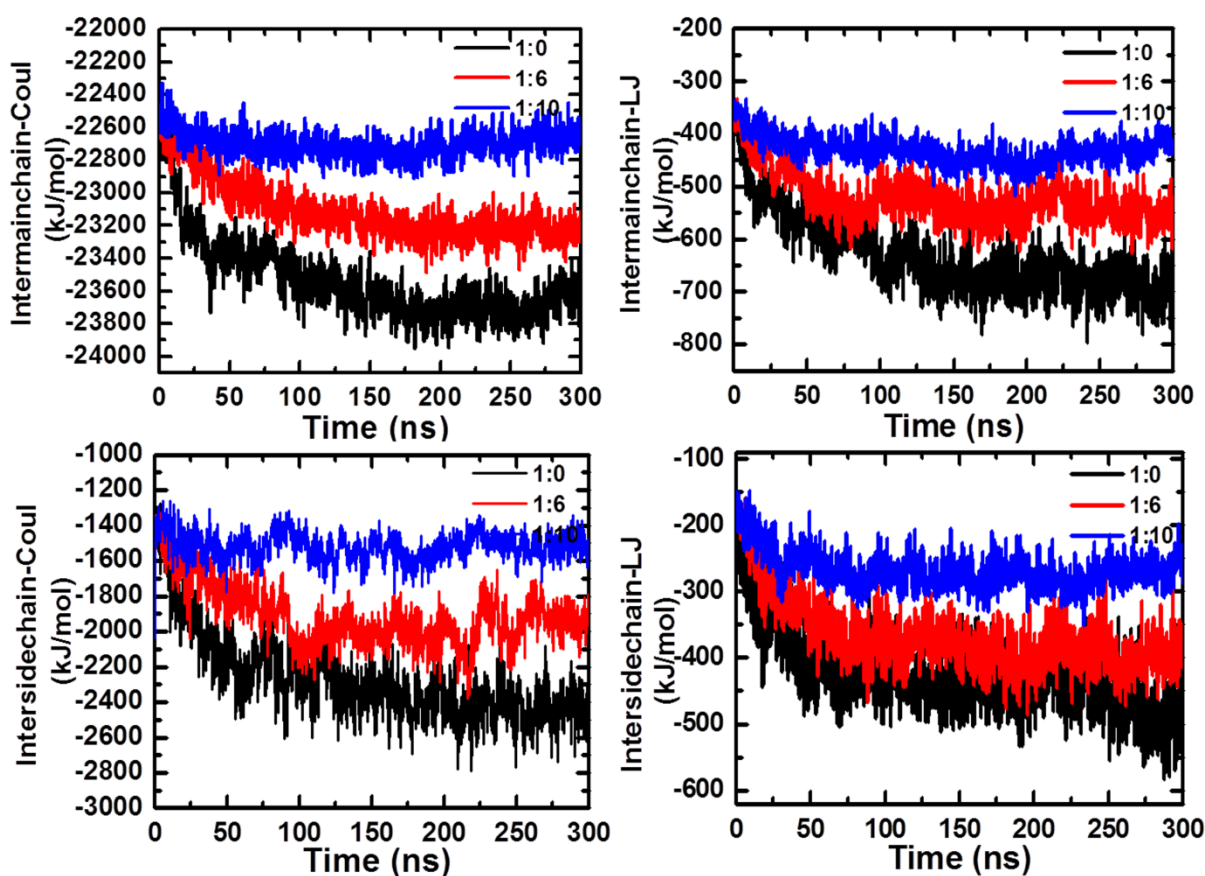

**SI Fig 10:** Time variation of interchain mainchain and sidechain coulombic and Lennard Jones Interaction energies at 8 mM peptide concentration in the presence of different peptide:trehalose molar ratio.

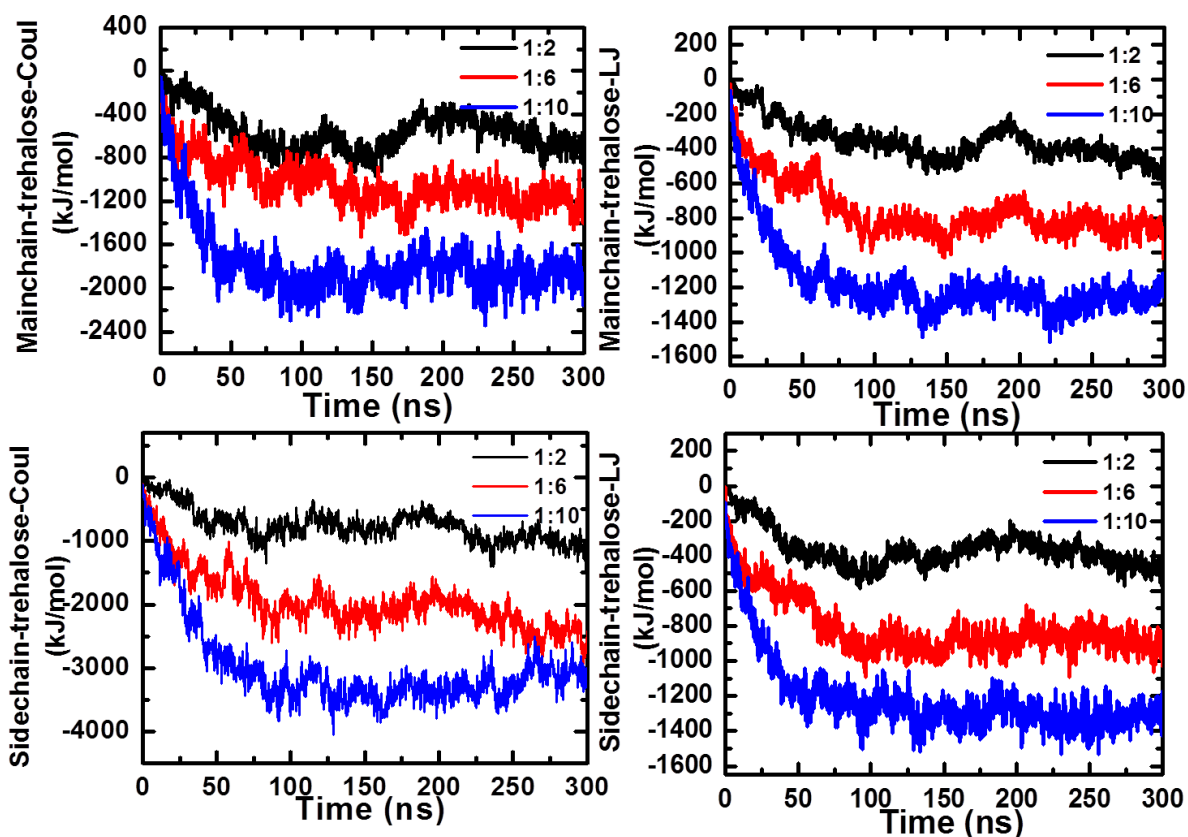

**SI Fig 11:** Time variation of mainchain and sidechain coulombic and Lennard Jones Interaction energies of peptide molecules at 8 mM peptide concentration with trehalose molecules in the presence of different peptide:trehalose molar ratio.

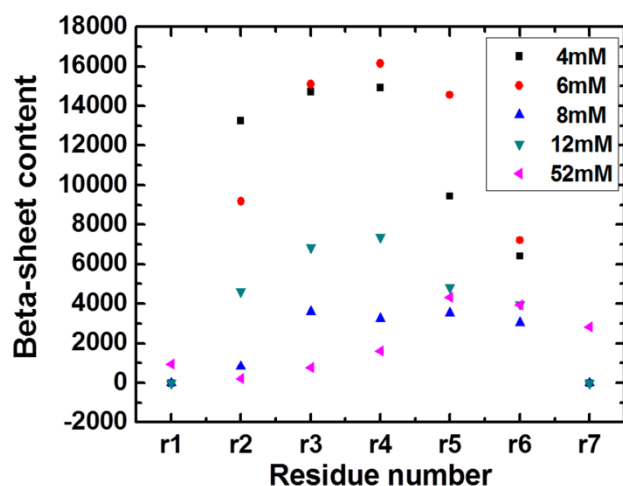

**SI Fig 12:** Beta-sheet content of different residues.

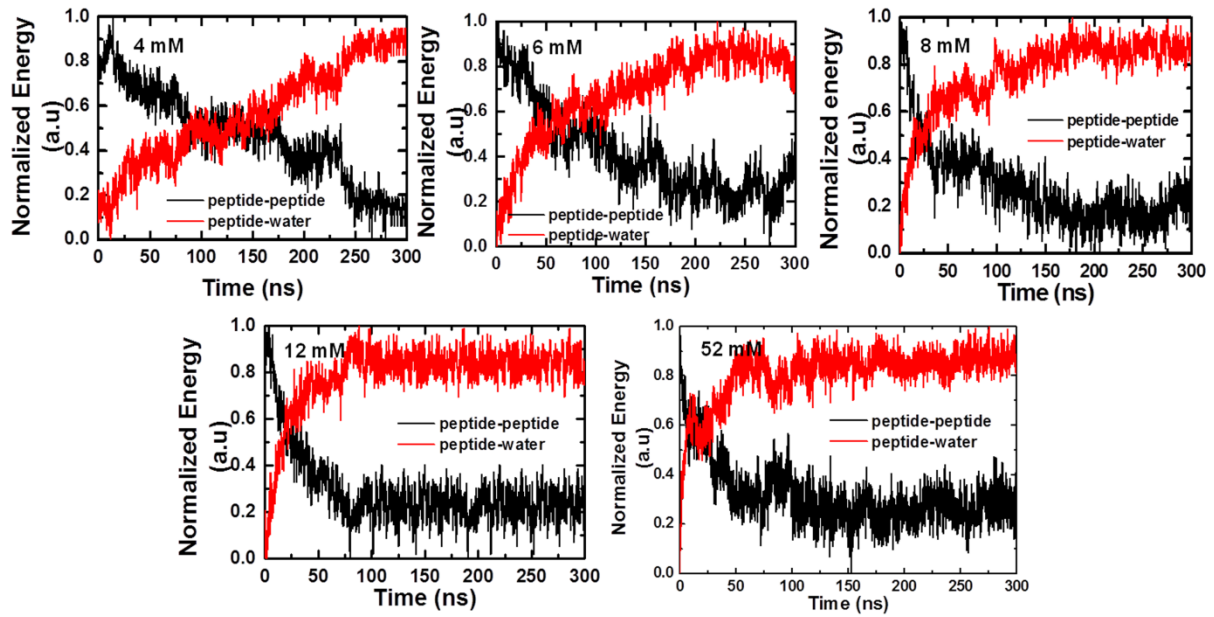

**SI Fig 13:** Time evolution of normalized interpeptide mainchain (peptide-peptide) and mainchain-water (peptide-water) Coulombic interaction energy at different peptide concentrations at 300 K.

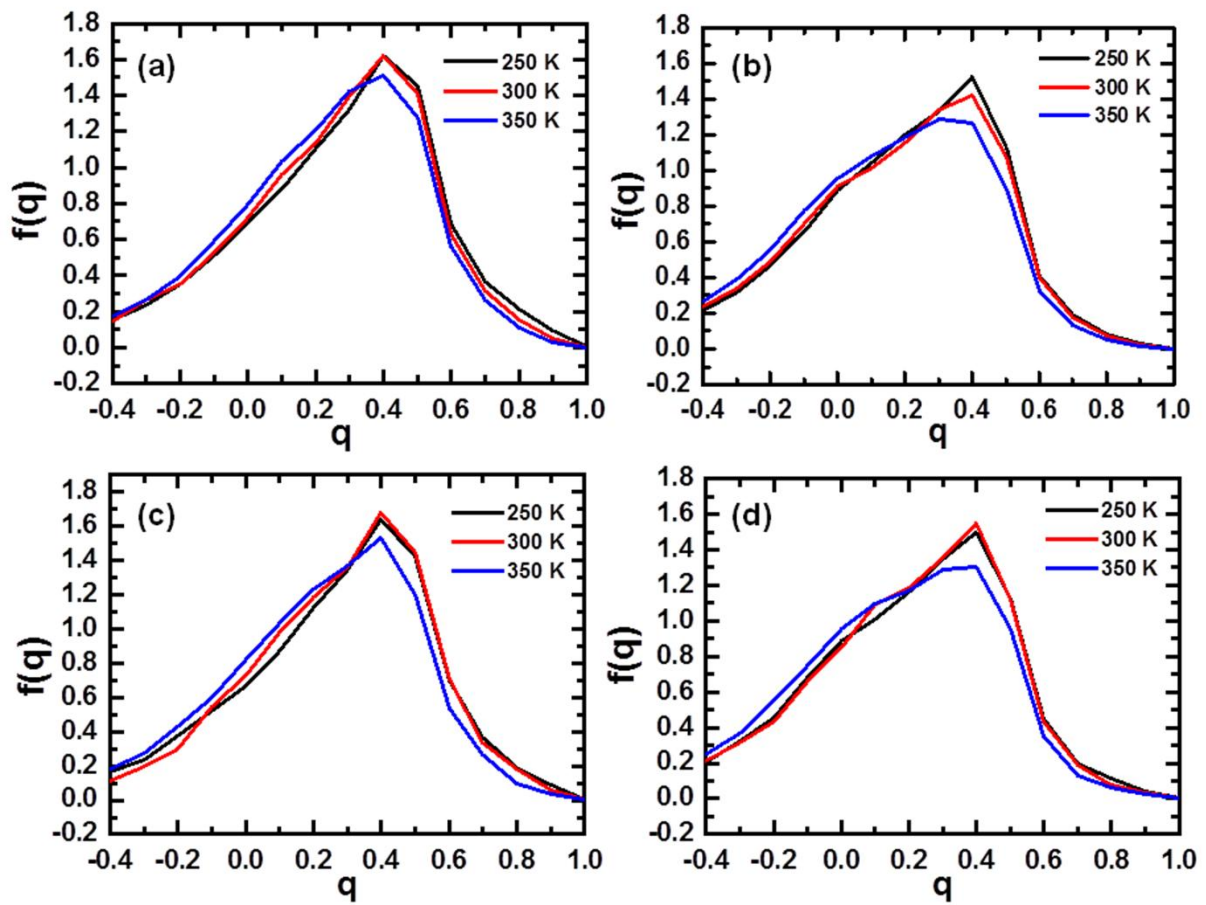



**SI Fig 14:** Tetrahedral orientational order parameter ( $q_{tet}$ ) of (a) bulk water molecules (b) local water molecules during small oligomer formation, and (c) bulk water molecules (d) local water molecules during large oligomer formation, at different temperatures for 8 mM peptide concentration.

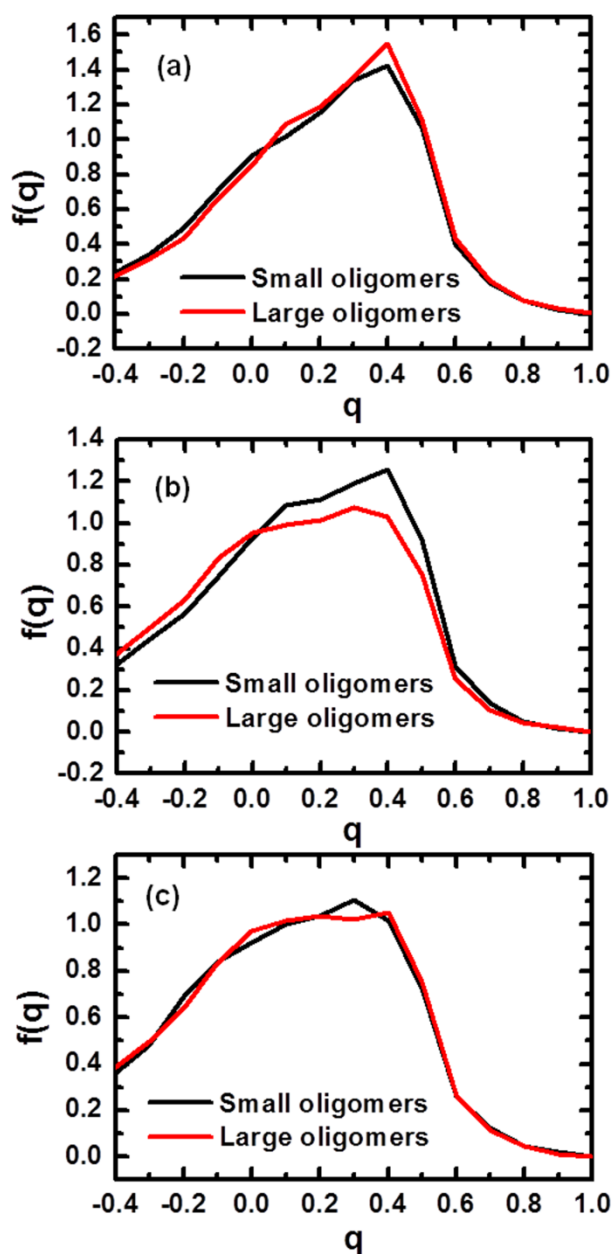

**SI Fig 15:** Tetrahedral orientational order parameter ( $q_{tet}$ ) of local water molecules at 8 mM peptide concentration, 300 K during two different time zones in the presence of different peptide:trehalose molar ratio: (a) 1:0 (b) 1:6 (c) 1:10.

**SI Table 4:** Mean number of water molecules forming hydrogen bonds with peptides with n atoms involved in bonding.

| Peptide:<br>Trehalose<br>molar ratio |                    | Total       | n=1                   | n=2                 | n=3                | n=4 |
|--------------------------------------|--------------------|-------------|-----------------------|---------------------|--------------------|-----|
| 1:6                                  | Small<br>oligomers | 339±17.56   | 306.17±33.09<br>(90%) | 42.67±4.27<br>(13%) | 2.2±0.89<br>(0.6%) | 0   |
|                                      | Large<br>oligomers | 258.2±23.16 | 223.5±21.25<br>(87%)  | 35.5±18.22<br>(14%) | 5±1.41<br>(2%)     | 1   |
| 1:10                                 | Small<br>oligomers | 279.8±5.63  | 250.67±10.89<br>(90%) | 29.67±4.13<br>(11%) | 3±1.09<br>(1%)     | 1   |
|                                      | Large<br>oligomers | 288.6±7.27  | 250.67±9.99<br>(87%)  | 31.17±4.83<br>(11%) | 3.2±1.3<br>(1%)    | 1   |

**SI Table 5:** Mean number of trehalose molecules forming hydrogen bonds with peptides with n atoms involved in bonding.

| Peptide:<br>Trehalose<br>molar ratio |                    | Total      | n=1                 | n=2                 | n=3                 | n=4                |
|--------------------------------------|--------------------|------------|---------------------|---------------------|---------------------|--------------------|
| 1:6                                  | Small<br>oligomers | 29.5±4.59  | 11±1.79<br>(37%)    | 6.17±2.40<br>(21%)  | 5.83±1.72<br>(20%)  | 3.00±1.73<br>(10%) |
|                                      | Large<br>oligomers | 39.67±2.73 | 11±1.79<br>(28%)    | 10±3.89<br>(25%)    | 9.83±2.32<br>(25%)  | 5.00±2.19<br>(13%) |
| 1:10                                 | Small<br>oligomers | 73.17±2.71 | 27.67±4.63<br>(38%) | 20.83±5.84<br>(28%) | 11.67±4.37<br>(16%) | 5.00±2.37<br>(7%)  |
|                                      | Large<br>oligomers | 70.30±4.80 | 27.00±4.82<br>(38%) | 20.5±3.15<br>(29%)  | 10.5±2.34<br>(15%)  | 5.2±2.17<br>(7%)   |

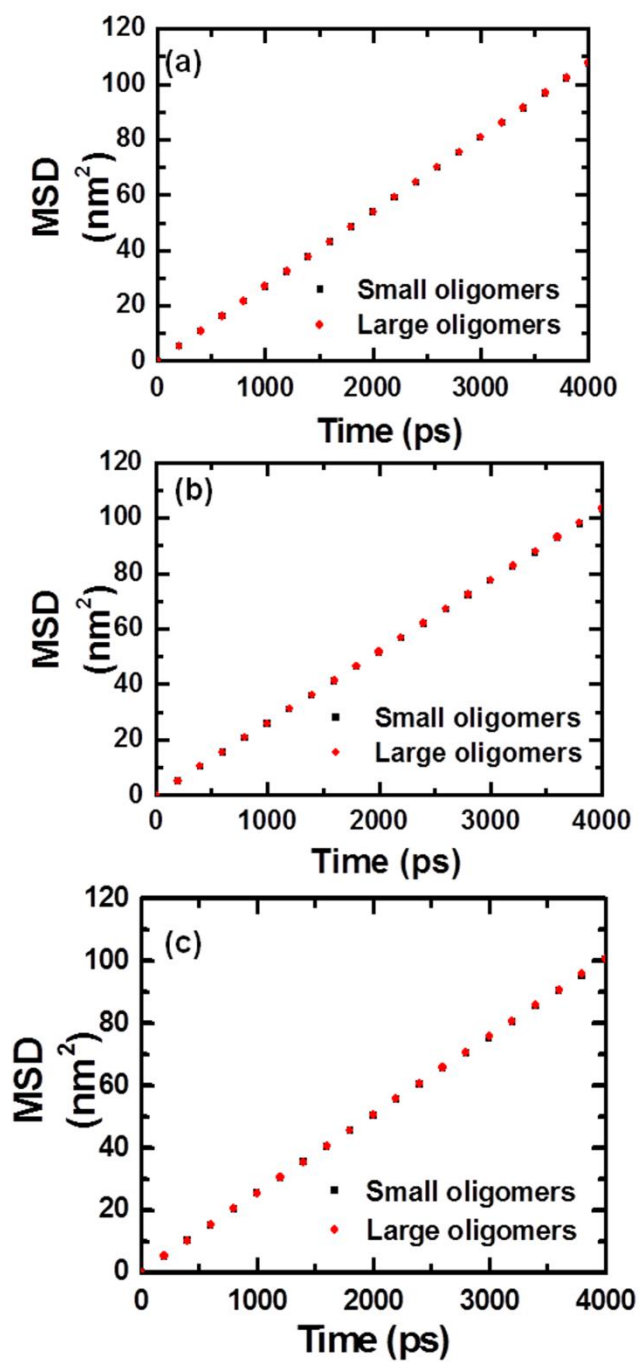

**SI Fig 16:** MSD of total water molecules at 8 mM during two different time zones in the presence of peptide:trehalose molar ratio: (a) 1:0 (b) 1:6 (c) 1:10.
